# Supplementary material
Source: Springer Nature journal article supplement (https://www.springermedizin.de/resource/supplementary/12936_2011_2044_MOESM6_ESM.pdf/9543386)

## Antibody Production in Children and Adults

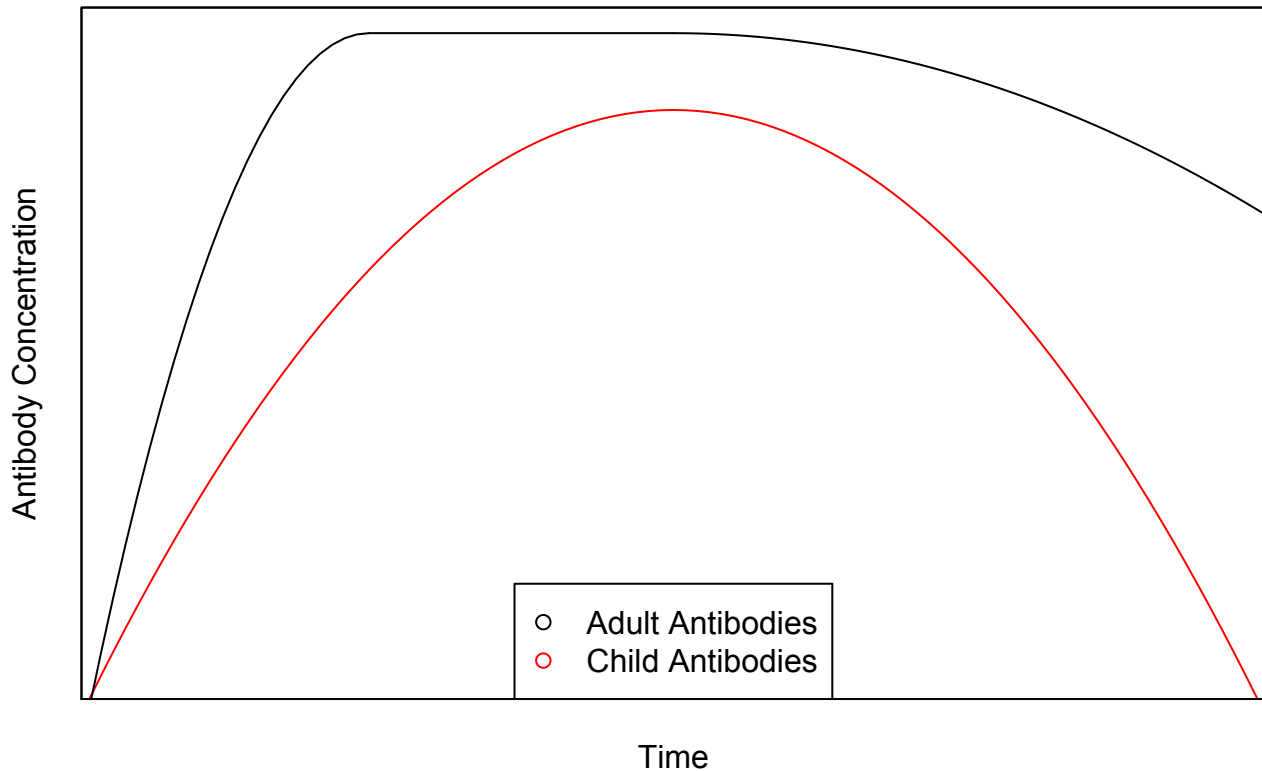

Supplement: MOESM6 [file 9543386]
